# Supplementary material for: An Adeno-Associated Viral Vector Capable of Penetrating the Mucus Barrier to Inhaled Gene Therapy
Source: PubMed Central journal article supplement — Mol Ther Methods Clin Dev. 2018 Mar 22;9:296–304. doi: 10.1016/j.omtm.2018.03.006 (PMC6054694; doi:10.1016/j.omtm.2018.03.006), 2018-03-22
Supplement: mmc1.pdf [file mmc1.pdf]

**OMTM, Volume 9**

## **Supplemental Information**

### **An Adeno-Associated Viral Vector Capable of Penetrating the Mucus Barrier to Inhaled Gene Therapy**

**Gregg A. Duncan, Namho Kim, Yanerys Colon-Cortes, Jason Rodriguez, Marina Mazur, Susan E. Birket, Steven M. Rowe, Natalie E. West, Alessandra Livraghi-Butrico, Richard C. Boucher, Justin Hanes, George Aslanidi, and Jung Soo Suk**

**Supplementary Table 1. Patient Demographics for Figure 1**

|                                                                                                                   |             |
|-------------------------------------------------------------------------------------------------------------------|-------------|
| <b>Number of Patients</b>                                                                                         | 10          |
| <b>Age (yr, mean <math>\pm</math> SD)</b>                                                                         | 31 $\pm$ 6  |
| <b>Forced expiratory volume after 1 second, FEV<sub>1</sub><br/>(% predicted value, mean <math>\pm</math> SD)</b> | 63 $\pm$ 25 |
| <b>Gender (number)</b>                                                                                            |             |
| Male                                                                                                              | 3           |
| Female                                                                                                            | 7           |
| <b>CFTR genotype (number)</b>                                                                                     |             |
| F508del homozygous                                                                                                | 6           |
| F508del heterozygous                                                                                              | 3           |
| Other                                                                                                             | 1           |

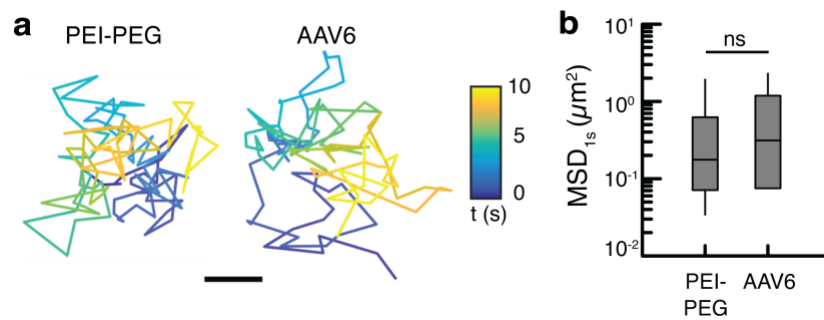

**Supplementary Figure 1.** Synthetic and viral gene vector diffusion in spontaneously expectorated CF sputum. **(a)** Representative trajectories of synthetic mucus-penetrating gene delivery nanoparticles based on polyethylene glycol-conjugated polyethylenimine (PEI-PEG)<sup>19</sup> and AAV6 in CF sputum. Trajectories show ~10 seconds of gene vector motions. Color bar indicates the time (t) of the trajectory in seconds. Scale bar = 1 μm. **(b)** Box-and-whisker plots of MSD<sub>1s</sub> of PEI-PEG and AAV6 in sputum samples collected from 3 individual CF patients. Maximum whisker length is 1.5 times the interquartile range; outliers are not shown. A Mann-Whitney test was used to compare MSD<sub>1s</sub> and there was no significant difference (p>0.05).

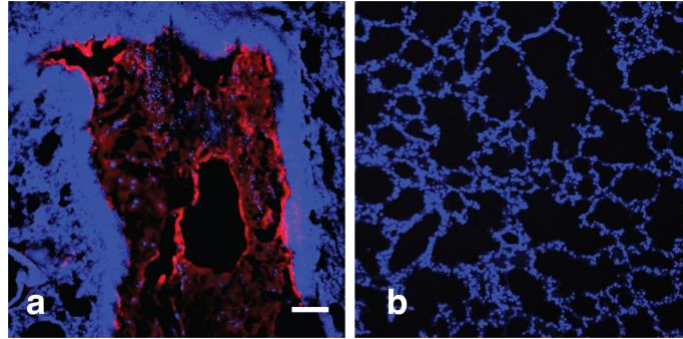

**Supplementary Figure 2.** *Mucus in the lungs of Scnn1b-Tg mice.* Representative confocal images of mucus in the airways **(a)** versus the airspace **(b)**. Cell nuclei and DNA are stained with DAPI (blue) and mucins are stained with anti-MUC5B/5AC Ab (red).
